# Supplementary material
Source: MDPI journal article supplement (https://www.mdpi.com/2075-1680/12/6/565)
Supplement: s1 [file s1]

## Supplementary Materials

# Statistical Evaluations and Applications for IER Parameters from Generalized Progressively Type-II Hybrid Censored Data

Ahmed Elshahhat<sup>1\*</sup>, Heba S. Mohammed<sup>2</sup> and Osama E. Abo-Kasem<sup>3</sup>

<sup>1</sup>Faculty of Technology and Development, Zagazig University, Zagazig 44519, Egypt

<sup>2</sup>Department of Mathematical Sciences, College of Science, Princess Nourah bint Abdulrahman University,  
P.O. Box 84428, Riyadh 11671, Saudi Arabia

<sup>3</sup>Department of Statistics, Faculty of Commerce, Zagazig University, Zagazig 44519, Egypt

---

\*Email: aelshahhat@dtd.zu.edu.eg

Table S1: The Av.Es (1st column), RMSEs (2nd column) and MABs (3rd column) of  $\delta$ .

| $(T_1, T_2)$      | $(n, m)$ | Scheme | MLE   |       |       | SE       |       |       |          |       | GE    |        |       |        |
|-------------------|----------|--------|-------|-------|-------|----------|-------|-------|----------|-------|-------|--------|-------|--------|
|                   |          |        |       |       |       | P1<br>P2 |       |       | P1<br>P2 |       | -2    |        | +2    |        |
|                   |          |        |       |       |       |          |       |       |          |       |       |        |       |        |
| $\nu \rightarrow$ |          |        |       |       |       |          |       |       |          |       |       |        |       |        |
| (0.5,1.5)         | (40,20)  | 1      | 1.620 | 0.527 | 0.389 | 1.296    | 0.256 | 0.224 | 1.305    | 0.196 | 0.195 | 1.271  | 0.229 | 0.229  |
|                   |          |        |       |       |       | 1.607    | 0.118 | 0.107 | 1.608    | 0.108 | 0.108 | 1.604  | 0.105 | 0.104  |
|                   |          | 2      | 1.652 | 0.534 | 0.388 | 1.822    | 0.343 | 0.324 | 1.826    | 0.327 | 0.326 | 1.810  | 0.312 | 0.310  |
|                   |          |        |       |       |       | 1.623    | 0.130 | 0.124 | 1.624    | 0.124 | 0.124 | 1.622  | 0.122 | 0.122  |
|                   |          | 3      | 1.654 | 0.491 | 0.369 | 1.287    | 0.259 | 0.225 | 1.296    | 0.205 | 0.204 | 1.265  | 0.235 | 0.235  |
|                   |          |        |       |       |       | 1.570    | 0.076 | 0.070 | 1.570    | 0.070 | 0.070 | 1.569  | 0.069 | 0.069  |
|                   | (40,32)  | 1      | 1.625 | 0.469 | 0.356 | 1.643    | 0.204 | 0.161 | 1.650    | 0.150 | 0.150 | 1.355  | 0.145 | 0.145  |
|                   |          |        |       |       |       | 1.574    | 0.079 | 0.074 | 1.574    | 0.074 | 0.074 | 1.573  | 0.073 | 0.073  |
|                   |          | 2      | 1.638 | 0.466 | 0.352 | 1.286    | 0.261 | 0.228 | 1.294    | 0.206 | 0.206 | 1.262  | 0.238 | 0.238  |
|                   |          |        |       |       |       | 1.571    | 0.076 | 0.071 | 1.571    | 0.071 | 0.071 | 1.570  | 0.070 | 0.070  |
|                   |          | 3      | 1.616 | 0.448 | 0.339 | 1.673    | 0.223 | 0.187 | 1.679    | 0.179 | 0.179 | 1.656  | 0.156 | 0.156  |
|                   |          |        |       |       |       | 1.552    | 0.060 | 0.053 | 1.552    | 0.053 | 0.052 | 1.551  | 0.052 | 0.051  |
|                   | (80,40)  | 1      | 1.555 | 0.355 | 0.280 | 1.362    | 0.162 | 0.147 | 1.364    | 0.136 | 0.136 | 1.624  | 0.124 | 0.124  |
|                   |          |        |       |       |       | 1.563    | 0.070 | 0.063 | 1.563    | 0.063 | 0.063 | 1.562  | 0.062 | 0.062  |
|                   |          | 2      | 1.576 | 0.335 | 0.261 | 1.391    | 0.137 | 0.121 | 1.393    | 0.107 | 0.107 | 1.384  | 0.116 | 0.116  |
|                   |          |        |       |       |       | 1.558    | 0.066 | 0.059 | 1.559    | 0.059 | 0.059 | 1.557  | 0.058 | 0.057  |
|                   |          | 3      | 1.577 | 0.314 | 0.240 | 1.365    | 0.158 | 0.141 | 1.367    | 0.133 | 0.133 | 1.358  | 0.142 | 0.142  |
|                   |          |        |       |       |       | 1.510    | 0.054 | 0.046 | 1.514    | 0.014 | 0.014 | 1.513  | 0.014 | 0.013  |
|                   | (80,64)  | 1      | 1.551 | 0.311 | 0.243 | 1.468    | 0.070 | 0.059 | 1.469    | 0.031 | 0.031 | 1.464  | 0.036 | 0.036  |
|                   |          |        |       |       |       | 1.513    | 0.056 | 0.047 | 1.514    | 0.016 | 0.014 | 1.510  | 0.012 | 0.010  |
|                   |          | 2      | 1.558 | 0.301 | 0.234 | 1.478    | 0.068 | 0.059 | 1.480    | 0.021 | 0.020 | 1.474  | 0.027 | 0.026  |
|                   |          |        |       |       |       | 1.511    | 0.055 | 0.047 | 1.512    | 0.014 | 0.012 | 1.508  | 0.010 | 0.008  |
|                   |          | 3      | 1.547 | 0.289 | 0.226 | 1.475    | 0.070 | 0.060 | 1.477    | 0.024 | 0.023 | 1.471  | 0.030 | 0.029  |
|                   |          |        |       |       |       | 1.514    | 0.027 | 0.022 | 1.511    | 0.013 | 0.011 | 1.508  | 0.010 | 0.008  |
| (1.5,2.5)         | (40,20)  | 1      | 1.611 | 0.449 | 0.346 | 1.273    | 0.275 | 0.240 | 1.283    | 0.218 | 0.217 | 1.2479 | 0.252 | 0.2521 |
|                   |          |        |       |       |       | 1.598    | 0.108 | 0.098 | 1.598    | 0.098 | 0.098 | 1.5955 | 0.096 | 0.0955 |
|                   |          | 2      | 1.632 | 0.447 | 0.341 | 1.284    | 0.262 | 0.228 | 1.292    | 0.208 | 0.208 | 1.2610 | 0.239 | 0.2390 |
|                   |          |        |       |       |       | 1.598    | 0.108 | 0.098 | 1.598    | 0.098 | 0.098 | 1.5955 | 0.096 | 0.0955 |
|                   |          | 3      | 1.517 | 0.433 | 0.335 | 1.263    | 0.281 | 0.245 | 1.272    | 0.229 | 0.228 | 1.2389 | 0.261 | 0.2611 |
|                   |          |        |       |       |       | 1.567    | 0.073 | 0.067 | 1.567    | 0.067 | 0.067 | 1.5661 | 0.066 | 0.0661 |
|                   | (40,32)  | 1      | 1.598 | 0.402 | 0.309 | 1.619    | 0.194 | 0.156 | 1.361    | 0.139 | 0.139 | 1.3512 | 0.149 | 0.1488 |
|                   |          |        |       |       |       | 1.569    | 0.075 | 0.069 | 1.570    | 0.070 | 0.070 | 1.5685 | 0.069 | 0.0685 |
|                   |          | 2      | 1.603 | 0.396 | 0.304 | 1.607    | 0.183 | 0.149 | 1.373    | 0.127 | 0.127 | 1.3639 | 0.136 | 0.1361 |
|                   |          |        |       |       |       | 1.570    | 0.075 | 0.070 | 1.570    | 0.070 | 0.070 | 1.5689 | 0.069 | 0.0689 |
|                   |          | 3      | 1.607 | 0.395 | 0.299 | 1.358    | 0.164 | 0.147 | 1.361    | 0.139 | 0.139 | 1.3512 | 0.149 | 0.1488 |
|                   |          |        |       |       |       | 1.551    | 0.059 | 0.052 | 1.552    | 0.052 | 0.052 | 1.5505 | 0.051 | 0.0505 |
|                   | (80,40)  | 1      | 1.484 | 0.286 | 0.224 | 1.358    | 0.164 | 0.147 | 1.627    | 0.127 | 0.127 | 1.5976 | 0.098 | 0.0976 |
|                   |          |        |       |       |       | 1.551    | 0.059 | 0.052 | 1.552    | 0.052 | 0.052 | 1.5505 | 0.051 | 0.0505 |
|                   |          | 2      | 1.555 | 0.295 | 0.229 | 1.371    | 0.153 | 0.137 | 1.614    | 0.114 | 0.114 | 1.5864 | 0.087 | 0.0864 |
|                   |          |        |       |       |       | 1.556    | 0.064 | 0.056 | 1.556    | 0.056 | 0.056 | 1.5549 | 0.055 | 0.0549 |
|                   |          | 3      | 1.484 | 0.286 | 0.224 | 1.406    | 0.122 | 0.097 | 1.408    | 0.092 | 0.092 | 1.3989 | 0.101 | 0.1011 |
|                   |          |        |       |       |       | 1.494    | 0.049 | 0.042 | 1.495    | 0.008 | 0.007 | 1.4920 | 0.009 | 0.0083 |
|                   | (80,64)  | 1      | 1.539 | 0.266 | 0.211 | 1.459    | 0.071 | 0.058 | 1.460    | 0.040 | 0.040 | 1.4557 | 0.044 | 0.0443 |
|                   |          |        |       |       |       | 1.499    | 0.052 | 0.045 | 1.500    | 0.006 | 0.005 | 1.4966 | 0.007 | 0.0058 |
|                   |          | 2      | 1.538 | 0.259 | 0.206 | 1.458    | 0.071 | 0.058 | 1.459    | 0.041 | 0.041 | 1.4543 | 0.046 | 0.0457 |
|                   |          |        |       |       |       | 1.501    | 0.052 | 0.045 | 1.502    | 0.007 | 0.006 | 1.4987 | 0.006 | 0.0052 |
|                   |          | 3      | 1.541 | 0.251 | 0.200 | 1.442    | 0.082 | 0.067 | 1.443    | 0.057 | 0.057 | 1.4384 | 0.062 | 0.0616 |
|                   |          |        |       |       |       | 1.500    | 0.020 | 0.016 | 1.500    | 0.003 | 0.003 | 1.4994 | 0.003 | 0.0026 |

Table S2: The Av.Es (1st column), RMSEs (2nd column) and MABs (3rd column) of  $\mu$ .

| $(T_1, T_2)$      | $(n, m)$ | Scheme | MLE   |       |       | SE       |       |       |          |       | GE    |       |       |       |
|-------------------|----------|--------|-------|-------|-------|----------|-------|-------|----------|-------|-------|-------|-------|-------|
|                   |          |        |       |       |       | P1<br>P2 |       |       | P1<br>P2 |       | -2    |       | +2    |       |
|                   |          |        |       |       |       |          |       |       |          |       |       |       |       |       |
| $\nu \rightarrow$ |          |        |       |       |       |          |       |       |          |       |       |       |       |       |
| (0.5,1.5)         | (40,20)  | 1      | 1.190 | 0.669 | 0.452 | 1.561    | 0.542 | 0.411 | 1.519    | 0.520 | 0.419 | 1.473 | 0.475 | 0.373 |
|                   |          |        |       |       |       | 1.144    | 0.170 | 0.146 | 1.148    | 0.149 | 0.148 | 1.143 | 0.144 | 0.143 |
|                   |          |        |       |       |       | 1.522    | 0.599 | 0.417 | 1.549    | 0.551 | 0.472 | 1.447 | 0.448 | 0.447 |
|                   |          | 2      | 1.264 | 0.745 | 0.491 | 1.160    | 0.180 | 0.160 | 1.162    | 0.163 | 0.162 | 1.151 | 0.152 | 0.151 |
|                   |          |        |       |       |       | 1.580    | 0.681 | 0.383 | 1.619    | 0.621 | 0.370 | 1.460 | 0.465 | 0.345 |
|                   |          |        |       |       |       | 1.137    | 0.162 | 0.150 | 1.151    | 0.151 | 0.151 | 1.147 | 0.148 | 0.147 |
|                   | (40,32)  | 1      | 1.157 | 0.510 | 0.366 | 1.505    | 0.447 | 0.309 | 1.501    | 0.402 | 0.301 | 1.457 | 0.460 | 0.257 |
|                   |          |        |       |       |       | 1.146    | 0.152 | 0.144 | 1.147    | 0.147 | 0.147 | 1.134 | 0.135 | 0.134 |
|                   |          |        |       |       |       | 1.498    | 0.451 | 0.298 | 1.516    | 0.417 | 0.319 | 1.441 | 0.444 | 0.313 |
|                   |          | 2      | 1.181 | 0.536 | 0.375 | 1.137    | 0.161 | 0.137 | 1.149    | 0.149 | 0.149 | 1.145 | 0.145 | 0.145 |
|                   |          |        |       |       |       | 1.527    | 0.403 | 0.272 | 1.514    | 0.415 | 0.314 | 1.447 | 0.450 | 0.296 |
|                   |          |        |       |       |       | 1.150    | 0.156 | 0.138 | 0.131    | 0.141 | 0.141 | 1.128 | 0.129 | 0.128 |
|                   | (80,40)  | 1      | 1.078 | 0.400 | 0.297 | 1.484    | 0.336 | 0.264 | 1.372    | 0.372 | 0.272 | 1.419 | 0.337 | 0.219 |
|                   |          |        |       |       |       | 1.107    | 0.112 | 0.107 | 1.107    | 0.108 | 0.107 | 1.106 | 0.106 | 0.106 |
|                   |          |        |       |       |       | 1.466    | 0.386 | 0.266 | 1.472    | 0.373 | 0.249 | 1.431 | 0.344 | 0.237 |
|                   |          | 2      | 1.122 | 0.437 | 0.315 | 1.148    | 0.154 | 0.148 | 1.140    | 0.141 | 0.140 | 1.128 | 0.129 | 0.128 |
|                   |          |        |       |       |       | 1.497    | 0.331 | 0.198 | 1.414    | 0.314 | 0.214 | 1.434 | 0.437 | 0.200 |
|                   |          |        |       |       |       | 1.132    | 0.148 | 0.133 | 1.134    | 0.135 | 0.139 | 1.126 | 0.127 | 0.126 |
|                   | (80,64)  | 1      | 1.067 | 0.321 | 0.238 | 1.368    | 0.303 | 0.218 | 1.591    | 0.293 | 0.191 | 1.354 | 0.270 | 0.154 |
|                   |          |        |       |       |       | 1.094    | 0.110 | 0.094 | 1.095    | 0.096 | 0.095 | 1.089 | 0.090 | 0.089 |
|                   |          |        |       |       |       | 1.363    | 0.277 | 0.211 | 1.367    | 0.267 | 0.211 | 1.350 | 0.251 | 0.197 |
|                   |          | 2      | 1.078 | 0.326 | 0.234 | 1.110    | 0.115 | 0.110 | 1.110    | 0.111 | 0.110 | 1.108 | 0.109 | 0.108 |
|                   |          |        |       |       |       | 1.410    | 0.214 | 0.188 | 1.554    | 0.250 | 0.152 | 1.396 | 0.397 | 0.140 |
|                   |          |        |       |       |       | 1.131    | 0.137 | 0.131 | 0.132    | 0.131 | 0.134 | 1.128 | 0.121 | 0.122 |
| (1.5,2.5)         | (40,20)  | 1      | 1.116 | 0.422 | 0.309 | 1.620    | 0.362 | 0.222 | 1.689    | 0.391 | 0.239 | 1.563 | 0.367 | 0.225 |
|                   |          |        |       |       |       | 1.164    | 0.191 | 0.206 | 1.168    | 0.169 | 0.168 | 1.158 | 0.158 | 0.158 |
|                   |          |        |       |       |       | 1.640    | 0.414 | 0.333 | 1.670    | 0.438 | 0.254 | 1.570 | 0.373 | 0.230 |
|                   |          | 2      | 1.174 | 0.521 | 0.362 | 1.160    | 0.188 | 0.160 | 1.164    | 0.165 | 0.164 | 1.150 | 0.150 | 0.150 |
|                   |          |        |       |       |       | 1.677    | 0.317 | 0.217 | 1.706    | 0.279 | 0.206 | 1.590 | 0.292 | 0.202 |
|                   |          |        |       |       |       | 1.169    | 0.197 | 0.173 | 1.174    | 0.195 | 0.184 | 1.169 | 0.170 | 0.169 |
|                   | (40,32)  | 1      | 1.087 | 0.340 | 0.251 | 1.546    | 0.296 | 0.185 | 1.636    | 0.237 | 0.216 | 1.572 | 0.218 | 0.172 |
|                   |          |        |       |       |       | 1.161    | 0.168 | 0.161 | 1.162    | 0.162 | 0.162 | 1.152 | 0.153 | 0.152 |
|                   |          |        |       |       |       | 1.629    | 0.326 | 0.227 | 1.646    | 0.327 | 0.215 | 1.552 | 0.255 | 0.192 |
|                   |          | 2      | 1.099 | 0.358 | 0.260 | 1.153    | 0.160 | 0.153 | 1.154    | 0.154 | 0.154 | 1.149 | 0.140 | 0.132 |
|                   |          |        |       |       |       | 1.575    | 0.227 | 0.176 | 1.594    | 0.226 | 0.194 | 1.505 | 0.208 | 0.182 |
|                   |          |        |       |       |       | 1.173    | 0.181 | 0.169 | 1.173    | 0.174 | 0.173 | 1.156 | 0.157 | 0.156 |
|                   | (80,40)  | 1      | 1.035 | 0.211 | 0.165 | 1.431    | 0.185 | 0.131 | 1.564    | 0.165 | 0.135 | 1.478 | 0.141 | 0.128 |
|                   |          |        |       |       |       | 1.112    | 0.129 | 0.119 | 1.133    | 0.133 | 0.130 | 1.130 | 0.130 | 0.130 |
|                   |          |        |       |       |       | 1.516    | 0.266 | 0.216 | 1.533    | 0.234 | 0.209 | 1.452 | 0.155 | 0.152 |
|                   |          | 2      | 1.068 | 0.314 | 0.238 | 1.127    | 0.134 | 0.127 | 1.128    | 0.128 | 0.128 | 1.125 | 0.125 | 0.125 |
|                   |          |        |       |       |       | 1.408    | 0.169 | 0.132 | 1.435    | 0.155 | 0.135 | 1.416 | 0.147 | 0.126 |
|                   |          |        |       |       |       | 1.132    | 0.139 | 0.108 | 1.133    | 0.133 | 0.113 | 1.130 | 0.130 | 0.103 |
|                   | (80,64)  | 1      | 0.937 | 0.195 | 0.157 | 1.660    | 0.159 | 0.122 | 1.435    | 0.135 | 0.119 | 1.416 | 0.122 | 0.116 |
|                   |          |        |       |       |       | 1.132    | 0.139 | 0.112 | 1.113    | 0.114 | 0.113 | 1.106 | 0.106 | 0.106 |
|                   |          |        |       |       |       | 1.428    | 0.143 | 0.128 | 1.432    | 0.161 | 0.143 | 1.412 | 0.113 | 0.112 |
|                   |          | 2      | 1.037 | 0.221 | 0.171 | 1.112    | 0.129 | 0.112 | 1.113    | 0.114 | 0.113 | 1.106 | 0.106 | 0.106 |
|                   |          |        |       |       |       | 1.431    | 0.145 | 0.093 | 1.427    | 0.127 | 0.127 | 1.353 | 0.114 | 0.113 |
|                   |          |        |       |       |       | 0.974    | 0.104 | 0.075 | 0.975    | 0.105 | 0.095 | 0.973 | 0.103 | 0.087 |

Table S3: The Av.Es (1st column), RMSEs (2nd column) and MABs (3rd column) of  $R(t)$ .

| $(T_1, T_2)$      | $(n, m)$ | Scheme | MLE   |       |       | SE       |       |       | GE       |       |       |          |       |       |    |
|-------------------|----------|--------|-------|-------|-------|----------|-------|-------|----------|-------|-------|----------|-------|-------|----|
|                   |          |        |       |       |       | P1<br>P2 |       |       | P1<br>P2 |       |       | P1<br>P2 |       |       |    |
|                   |          |        |       |       |       |          |       |       |          |       |       |          |       |       | -2 |
| $\nu \rightarrow$ |          |        |       |       |       |          |       |       |          |       |       |          |       |       |    |
| (0.5,1.5)         | (40,20)  | 1      | 0.930 | 0.137 | 0.130 | 0.843    | 0.102 | 0.088 | 0.930    | 0.089 | 0.085 | 0.842    | 0.088 | 0.083 |    |
|                   |          |        |       |       |       | 0.924    | 0.090 | 0.078 | 0.923    | 0.076 | 0.076 | 0.931    | 0.075 | 0.073 |    |
|                   |          | 2      | 0.932 | 0.132 | 0.126 | 0.844    | 0.100 | 0.087 | 0.845    | 0.086 | 0.086 | 0.839    | 0.082 | 0.080 |    |
|                   |          |        |       |       |       | 0.937    | 0.076 | 0.068 | 0.923    | 0.074 | 0.070 | 0.923    | 0.068 | 0.071 |    |
|                   |          | 3      | 0.933 | 0.131 | 0.125 | 0.847    | 0.098 | 0.084 | 0.848    | 0.082 | 0.082 | 0.840    | 0.081 | 0.080 |    |
|                   |          |        |       |       |       | 0.936    | 0.060 | 0.054 | 0.930    | 0.070 | 0.058 | 0.936    | 0.051 | 0.051 |    |
|                   | (40,32)  | 1      | 0.932 | 0.093 | 0.091 | 0.876    | 0.058 | 0.054 | 0.846    | 0.085 | 0.077 | 0.923    | 0.077 | 0.073 |    |
|                   |          |        |       |       |       | 0.930    | 0.036 | 0.040 | 0.924    | 0.070 | 0.056 | 0.878    | 0.053 | 0.052 |    |
|                   |          | 2      | 0.933 | 0.091 | 0.086 | 0.879    | 0.056 | 0.052 | 0.923    | 0.075 | 0.075 | 0.930    | 0.072 | 0.059 |    |
|                   |          |        |       |       |       | 0.930    | 0.036 | 0.037 | 0.936    | 0.052 | 0.052 | 0.885    | 0.046 | 0.046 |    |
|                   |          | 3      | 0.932 | 0.090 | 0.084 | 0.885    | 0.050 | 0.045 | 0.879    | 0.052 | 0.051 | 0.930    | 0.050 | 0.049 |    |
|                   |          |        |       |       |       | 0.930    | 0.034 | 0.031 | 0.937    | 0.048 | 0.043 | 0.892    | 0.039 | 0.039 |    |
|                   | (80,40)  | 1      | 0.930 | 0.074 | 0.072 | 0.889    | 0.045 | 0.042 | 0.876    | 0.054 | 0.054 | 0.888    | 0.042 | 0.042 |    |
|                   |          |        |       |       |       | 0.931    | 0.030 | 0.025 | 0.892    | 0.038 | 0.038 | 0.930    | 0.036 | 0.034 |    |
|                   |          | 2      | 0.931 | 0.072 | 0.071 | 0.892    | 0.041 | 0.038 | 0.885    | 0.045 | 0.045 | 0.893    | 0.038 | 0.038 |    |
|                   |          |        |       |       |       | 0.929    | 0.034 | 0.029 | 0.931    | 0.034 | 0.032 | 0.931    | 0.031 | 0.020 |    |
|                   |          | 3      | 0.931 | 0.071 | 0.070 | 0.893    | 0.040 | 0.037 | 0.889    | 0.042 | 0.042 | 0.875    | 0.041 | 0.040 |    |
|                   |          |        |       |       |       | 0.931    | 0.030 | 0.026 | 0.931    | 0.032 | 0.030 | 0.929    | 0.029 | 0.019 |    |
|                   | (80,64)  | 1      | 0.931 | 0.064 | 0.060 | 0.916    | 0.034 | 0.029 | 0.893    | 0.037 | 0.037 | 0.937    | 0.028 | 0.022 |    |
|                   |          |        |       |       |       | 0.923    | 0.028 | 0.025 | 0.930    | 0.022 | 0.020 | 0.914    | 0.019 | 0.016 |    |
|                   |          | 2      | 0.932 | 0.063 | 0.059 | 0.916    | 0.038 | 0.030 | 0.916    | 0.025 | 0.024 | 0.923    | 0.023 | 0.021 |    |
|                   |          |        |       |       |       | 0.923    | 0.017 | 0.018 | 0.942    | 0.019 | 0.022 | 0.942    | 0.017 | 0.017 |    |
|                   |          | 3      | 0.932 | 0.062 | 0.058 | 0.942    | 0.027 | 0.024 | 0.929    | 0.019 | 0.018 | 0.914    | 0.017 | 0.017 |    |
|                   |          |        |       |       |       | 0.923    | 0.013 | 0.011 | 0.917    | 0.015 | 0.014 | 0.923    | 0.014 | 0.012 |    |
| (1.5,2.5)         | (40,20)  | 1      | 0.930 | 0.124 | 0.125 | 0.835    | 0.111 | 0.096 | 0.831    | 0.100 | 0.099 | 0.824    | 0.107 | 0.103 |    |
|                   |          |        |       |       |       | 0.935    | 0.099 | 0.088 | 0.875    | 0.085 | 0.085 | 0.837    | 0.094 | 0.094 |    |
|                   |          | 2      | 0.932 | 0.121 | 0.122 | 0.841    | 0.103 | 0.090 | 0.836    | 0.094 | 0.094 | 0.875    | 0.095 | 0.090 |    |
|                   |          |        |       |       |       | 0.935    | 0.080 | 0.082 | 0.906    | 0.080 | 0.077 | 0.880    | 0.082 | 0.079 |    |
|                   |          | 3      | 0.929 | 0.113 | 0.121 | 0.829    | 0.101 | 0.081 | 0.896    | 0.084 | 0.084 | 0.920    | 0.084 | 0.088 |    |
|                   |          |        |       |       |       | 0.929    | 0.064 | 0.053 | 0.913    | 0.062 | 0.064 | 0.929    | 0.072 | 0.070 |    |
|                   | (40,32)  | 1      | 0.931 | 0.083 | 0.086 | 0.873    | 0.062 | 0.058 | 0.843    | 0.079 | 0.078 | 0.829    | 0.074 | 0.064 |    |
|                   |          |        |       |       |       | 0.873    | 0.052 | 0.048 | 0.929    | 0.076 | 0.071 | 0.872    | 0.065 | 0.054 |    |
|                   |          | 2      | 0.932 | 0.081 | 0.085 | 0.876    | 0.059 | 0.055 | 0.873    | 0.057 | 0.057 | 0.879    | 0.071 | 0.061 |    |
|                   |          |        |       |       |       | 0.903    | 0.045 | 0.034 | 0.881    | 0.049 | 0.049 | 0.935    | 0.062 | 0.047 |    |
|                   |          | 3      | 0.932 | 0.079 | 0.082 | 0.875    | 0.058 | 0.053 | 0.876    | 0.054 | 0.054 | 0.929    | 0.070 | 0.055 |    |
|                   |          |        |       |       |       | 0.920    | 0.042 | 0.031 | 0.932    | 0.047 | 0.046 | 0.903    | 0.048 | 0.040 |    |
|                   | (80,40)  | 1      | 0.930 | 0.068 | 0.062 | 0.880    | 0.053 | 0.051 | 0.873    | 0.057 | 0.057 | 0.872    | 0.058 | 0.058 |    |
|                   |          |        |       |       |       | 0.886    | 0.048 | 0.042 | 0.880    | 0.050 | 0.050 | 0.885    | 0.046 | 0.046 |    |
|                   |          | 2      | 0.931 | 0.066 | 0.061 | 0.881    | 0.052 | 0.050 | 0.935    | 0.048 | 0.048 | 0.874    | 0.056 | 0.056 |    |
|                   |          |        |       |       |       | 0.928    | 0.042 | 0.036 | 0.886    | 0.042 | 0.042 | 0.928    | 0.029 | 0.031 |    |
|                   |          | 3      | 0.930 | 0.064 | 0.060 | 0.928    | 0.046 | 0.038 | 0.935    | 0.048 | 0.048 | 0.935    | 0.048 | 0.048 |    |
|                   |          |        |       |       |       | 0.919    | 0.032 | 0.029 | 0.928    | 0.026 | 0.025 | 0.928    | 0.026 | 0.026 |    |
|                   | (80,64)  | 1      | 0.930 | 0.054 | 0.050 | 0.905    | 0.044 | 0.033 | 0.903    | 0.027 | 0.027 | 0.901    | 0.030 | 0.030 |    |
|                   |          |        |       |       |       | 0.928    | 0.041 | 0.032 | 0.928    | 0.023 | 0.023 | 0.928    | 0.021 | 0.021 |    |
|                   |          | 2      | 0.930 | 0.052 | 0.048 | 0.929    | 0.037 | 0.032 | 0.929    | 0.025 | 0.025 | 0.932    | 0.027 | 0.026 |    |
|                   |          |        |       |       |       | 0.932    | 0.030 | 0.025 | 0.930    | 0.020 | 0.022 | 0.920    | 0.020 | 0.020 |    |
|                   |          | 3      | 0.931 | 0.051 | 0.047 | 0.930    | 0.036 | 0.031 | 0.928    | 0.021 | 0.021 | 0.930    | 0.024 | 0.022 |    |
|                   |          |        |       |       |       | 0.920    | 0.021 | 0.020 | 0.919    | 0.016 | 0.019 | 0.919    | 0.019 | 0.018 |    |

Table S4: The Av.Es (1st column), RMSEs (2nd column) and MABs (3rd column) of  $h(t)$ .

| $(T_1, T_2)$      | $(n, m)$ | Scheme | MLE   |       |       | SE       |       |       | GE       |       |       |       |       |       |
|-------------------|----------|--------|-------|-------|-------|----------|-------|-------|----------|-------|-------|-------|-------|-------|
|                   |          |        |       |       |       | P1<br>P2 |       |       | P1<br>P2 |       |       |       |       |       |
|                   |          |        |       |       |       |          |       |       |          |       |       |       |       |       |
| $\nu \rightarrow$ |          |        |       |       |       |          |       |       | -2       |       | +2    |       |       |       |
| (0.5,1.5)         | (40,20)  | 1      | 0.512 | 0.208 | 0.169 | 1.071    | 0.196 | 0.142 | 1.114    | 0.184 | 0.149 | 0.895 | 0.169 | 0.136 |
|                   |          |        |       |       |       | 1.067    | 0.142 | 0.138 | 1.092    | 0.162 | 0.128 | 0.892 | 0.137 | 0.121 |
|                   |          |        |       |       |       | 0.834    | 0.169 | 0.134 | 0.877    | 0.146 | 0.123 | 0.871 | 0.134 | 0.120 |
|                   |          | 2      | 0.513 | 0.180 | 0.140 | 0.819    | 0.137 | 0.119 | 0.866    | 0.134 | 0.113 | 0.832 | 0.132 | 0.110 |
|                   |          |        |       |       |       | 0.594    | 0.156 | 0.113 | 0.560    | 0.129 | 0.121 | 0.502 | 0.121 | 0.113 |
|                   |          |        |       |       |       | 0.558    | 0.136 | 0.103 | 0.508    | 0.123 | 0.108 | 0.525 | 0.116 | 0.106 |
|                   | (40,32)  | 1      | 0.507 | 0.173 | 0.140 | 1.050    | 0.136 | 0.122 | 1.108    | 0.158 | 0.136 | 0.857 | 0.133 | 0.126 |
|                   |          |        |       |       |       | 0.868    | 0.104 | 0.119 | 0.899    | 0.137 | 0.122 | 0.804 | 0.127 | 0.113 |
|                   |          |        |       |       |       | 0.891    | 0.118 | 0.120 | 0.843    | 0.131 | 0.117 | 0.595 | 0.124 | 0.114 |
|                   |          | 2      | 0.506 | 0.164 | 0.132 | 0.591    | 0.093 | 0.106 | 0.838    | 0.127 | 0.111 | 0.585 | 0.106 | 0.105 |
|                   |          |        |       |       |       | 0.559    | 0.107 | 0.103 | 0.544    | 0.121 | 0.113 | 0.606 | 0.118 | 0.107 |
|                   |          |        |       |       |       | 0.544    | 0.091 | 0.100 | 0.525    | 0.112 | 0.102 | 0.507 | 0.104 | 0.100 |
|                   | (80,40)  | 1      | 0.517 | 0.141 | 0.114 | 0.856    | 0.112 | 0.102 | 0.831    | 0.129 | 0.100 | 0.825 | 0.119 | 0.094 |
|                   |          |        |       |       |       | 0.700    | 0.092 | 0.090 | 0.746    | 0.118 | 0.091 | 0.798 | 0.113 | 0.089 |
|                   |          |        |       |       |       | 0.829    | 0.102 | 0.087 | 0.555    | 0.104 | 0.084 | 0.587 | 0.099 | 0.082 |
|                   |          | 2      | 0.518 | 0.119 | 0.095 | 0.526    | 0.084 | 0.083 | 0.593    | 0.090 | 0.077 | 0.594 | 0.088 | 0.076 |
|                   |          |        |       |       |       | 0.596    | 0.098 | 0.082 | 0.548    | 0.102 | 0.078 | 0.558 | 0.087 | 0.074 |
|                   |          |        |       |       |       | 0.562    | 0.082 | 0.073 | 0.527    | 0.094 | 0.069 | 0.543 | 0.074 | 0.069 |
|                   | (80,64)  | 1      | 0.521 | 0.122 | 0.098 | 0.823    | 0.100 | 0.092 | 0.720    | 0.109 | 0.089 | 0.803 | 0.107 | 0.087 |
|                   |          |        |       |       |       | 0.690    | 0.087 | 0.078 | 0.596    | 0.090 | 0.082 | 0.561 | 0.089 | 0.077 |
|                   |          |        |       |       |       | 0.595    | 0.097 | 0.084 | 0.593    | 0.091 | 0.080 | 0.558 | 0.076 | 0.073 |
|                   |          | 2      | 0.521 | 0.114 | 0.091 | 0.548    | 0.076 | 0.070 | 0.556    | 0.084 | 0.069 | 0.594 | 0.063 | 0.063 |
|                   |          |        |       |       |       | 0.555    | 0.091 | 0.082 | 0.553    | 0.082 | 0.071 | 0.595 | 0.064 | 0.064 |
|                   |          |        |       |       |       | 0.508    | 0.070 | 0.068 | 0.547    | 0.067 | 0.066 | 0.563 | 0.060 | 0.060 |
| (1.5,2.5)         | (40,20)  | 1      | 0.517 | 0.199 | 0.162 | 1.124    | 0.177 | 0.159 | 0.921    | 0.189 | 0.152 | 0.910 | 0.184 | 0.140 |
|                   |          |        |       |       |       | 0.952    | 0.147 | 0.142 | 0.805    | 0.175 | 0.137 | 0.680 | 0.152 | 0.129 |
|                   |          |        |       |       |       | 0.896    | 0.163 | 0.136 | 0.921    | 0.144 | 0.124 | 0.665 | 0.138 | 0.113 |
|                   |          | 2      | 0.513 | 0.175 | 0.141 | 0.784    | 0.141 | 0.126 | 0.856    | 0.127 | 0.114 | 0.516 | 0.115 | 0.103 |
|                   |          |        |       |       |       | 0.842    | 0.147 | 0.121 | 1.127    | 0.135 | 0.108 | 0.560 | 0.129 | 0.104 |
|                   |          |        |       |       |       | 1.085    | 0.132 | 0.116 | 0.574    | 0.119 | 0.098 | 0.615 | 0.108 | 0.086 |
|                   | (40,32)  | 1      | 0.512 | 0.169 | 0.136 | 0.768    | 0.138 | 0.125 | 1.204    | 0.159 | 0.130 | 0.963 | 0.144 | 0.126 |
|                   |          |        |       |       |       | 0.518    | 0.128 | 0.120 | 0.963    | 0.133 | 0.119 | 0.557 | 0.126 | 0.112 |
|                   |          |        |       |       |       | 0.921    | 0.116 | 0.114 | 0.924    | 0.142 | 0.114 | 0.859 | 0.129 | 0.104 |
|                   |          | 2      | 0.511 | 0.160 | 0.129 | 0.912    | 0.108 | 0.101 | 0.905    | 0.124 | 0.105 | 0.562 | 0.111 | 0.096 |
|                   |          |        |       |       |       | 1.158    | 0.110 | 0.101 | 1.170    | 0.128 | 0.104 | 0.803 | 0.122 | 0.099 |
|                   |          |        |       |       |       | 0.911    | 0.102 | 0.094 | 0.932    | 0.112 | 0.091 | 0.564 | 0.103 | 0.083 |
|                   | (80,40)  | 1      | 0.524 | 0.121 | 0.097 | 0.911    | 0.107 | 0.089 | 0.820    | 0.110 | 0.092 | 0.875 | 0.095 | 0.084 |
|                   |          |        |       |       |       | 0.617    | 0.090 | 0.080 | 0.522    | 0.090 | 0.085 | 0.875 | 0.088 | 0.074 |
|                   |          |        |       |       |       | 0.558    | 0.104 | 0.085 | 0.617    | 0.087 | 0.086 | 0.562 | 0.083 | 0.081 |
|                   |          | 2      | 0.519 | 0.116 | 0.093 | 0.613    | 0.086 | 0.077 | 0.522    | 0.080 | 0.081 | 0.612 | 0.076 | 0.072 |
|                   |          |        |       |       |       | 0.573    | 0.098 | 0.079 | 0.566    | 0.080 | 0.082 | 0.877 | 0.072 | 0.078 |
|                   |          |        |       |       |       | 0.564    | 0.090 | 0.071 | 0.564    | 0.071 | 0.073 | 0.886 | 0.067 | 0.070 |
|                   | (80,64)  | 1      | 0.523 | 0.112 | 0.089 | 0.623    | 0.097 | 0.083 | 0.624    | 0.093 | 0.083 | 0.915 | 0.085 | 0.081 |
|                   |          |        |       |       |       | 0.565    | 0.082 | 0.074 | 0.562    | 0.085 | 0.078 | 0.621 | 0.080 | 0.070 |
|                   |          |        |       |       |       | 0.561    | 0.086 | 0.080 | 0.614    | 0.083 | 0.071 | 0.571 | 0.081 | 0.068 |
|                   |          | 2      | 0.505 | 0.110 | 0.081 | 0.522    | 0.075 | 0.070 | 0.559    | 0.076 | 0.060 | 0.521 | 0.071 | 0.059 |
|                   |          |        |       |       |       | 0.564    | 0.080 | 0.074 | 0.564    | 0.075 | 0.063 | 0.929 | 0.070 | 0.059 |
|                   |          |        |       |       |       | 0.522    | 0.072 | 0.067 | 0.518    | 0.069 | 0.057 | 0.521 | 0.064 | 0.048 |

Table S5: The ACLs (1st column) and CPs (2nd column) of 95% ACI/HPD intervals of  $\delta$ .

| $(T_1, T_2)$<br>Prior $\rightarrow$ | $(n, m)$ | Scheme | ACI   |       | HPD   |       |       |       |
|-------------------------------------|----------|--------|-------|-------|-------|-------|-------|-------|
|                                     |          |        |       |       | 1     |       | 2     |       |
|                                     |          |        | ACL   | CP    | ACL   | CP    | ACL   | CP    |
| (0.5,1.5)                           | (40,20)  | 1      | 1.982 | 0.942 | 0.526 | 0.964 | 0.170 | 0.976 |
|                                     |          | 2      | 1.880 | 0.944 | 0.485 | 0.966 | 0.167 | 0.977 |
|                                     |          | 3      | 1.740 | 0.945 | 0.474 | 0.967 | 0.165 | 0.977 |
|                                     | (40,32)  | 1      | 1.773 | 0.947 | 0.474 | 0.970 | 0.166 | 0.979 |
|                                     |          | 2      | 1.712 | 0.950 | 0.471 | 0.971 | 0.143 | 0.981 |
|                                     |          | 3      | 1.662 | 0.952 | 0.405 | 0.973 | 0.122 | 0.983 |
|                                     | (80,40)  | 1      | 1.408 | 0.949 | 0.342 | 0.976 | 0.120 | 0.985 |
|                                     |          | 2      | 1.292 | 0.951 | 0.320 | 0.978 | 0.114 | 0.988 |
|                                     |          | 3      | 1.177 | 0.955 | 0.296 | 0.980 | 0.111 | 0.989 |
|                                     | (80,64)  | 1      | 1.220 | 0.958 | 0.227 | 0.984 | 0.113 | 0.990 |
|                                     |          | 2      | 1.165 | 0.960 | 0.225 | 0.984 | 0.111 | 0.990 |
|                                     |          | 3      | 1.133 | 0.961 | 0.216 | 0.985 | 0.095 | 0.991 |
| (1.5,2.5)                           | (40,20)  | 1      | 1.699 | 0.948 | 0.492 | 0.967 | 0.164 | 0.978 |
|                                     |          | 2      | 1.608 | 0.950 | 0.482 | 0.969 | 0.160 | 0.979 |
|                                     |          | 3      | 1.593 | 0.952 | 0.454 | 0.970 | 0.158 | 0.979 |
|                                     | (40,32)  | 1      | 1.489 | 0.953 | 0.469 | 0.972 | 0.135 | 0.983 |
|                                     |          | 2      | 1.452 | 0.955 | 0.453 | 0.974 | 0.128 | 0.983 |
|                                     |          | 3      | 1.410 | 0.957 | 0.285 | 0.981 | 0.119 | 0.984 |
|                                     | (80,40)  | 1      | 1.111 | 0.960 | 0.309 | 0.978 | 0.124 | 0.986 |
|                                     |          | 2      | 1.105 | 0.961 | 0.299 | 0.980 | 0.119 | 0.989 |
|                                     |          | 3      | 1.111 | 0.962 | 0.212 | 0.985 | 0.113 | 0.989 |
|                                     | (80,64)  | 1      | 1.035 | 0.961 | 0.206 | 0.986 | 0.111 | 0.990 |
|                                     |          | 2      | 0.998 | 0.963 | 0.203 | 0.985 | 0.109 | 0.990 |
|                                     |          | 3      | 0.963 | 0.965 | 0.201 | 0.986 | 0.093 | 0.991 |

Table S6: The ACLs (1st column) and CPs (2nd column) of 95% ACI/HPD intervals of  $\mu$ .

| $(T_1, T_2)$<br>Prior $\rightarrow$ | $(n, m)$ | Scheme | ACI   |       | HPD   |       |       |       |
|-------------------------------------|----------|--------|-------|-------|-------|-------|-------|-------|
|                                     |          |        |       |       | 1     |       | 2     |       |
|                                     |          |        | ACL   | CP    | ACL   | CP    | ACL   | CP    |
| (0.5,1.5)                           | (40,20)  | 1      | 2.350 | 0.937 | 0.968 | 0.962 | 0.285 | 0.987 |
|                                     |          | 2      | 2.566 | 0.939 | 0.925 | 0.966 | 0.273 | 0.988 |
|                                     |          | 3      | 2.078 | 0.941 | 0.875 | 0.971 | 0.271 | 0.988 |
|                                     | (40,32)  | 1      | 1.886 | 0.942 | 0.788 | 0.970 | 0.217 | 0.989 |
|                                     |          | 2      | 1.878 | 0.944 | 0.735 | 0.977 | 0.197 | 0.991 |
|                                     |          | 3      | 1.689 | 0.948 | 0.721 | 0.978 | 0.180 | 0.993 |
|                                     | (80,40)  | 1      | 1.494 | 0.950 | 0.722 | 0.976 | 0.176 | 0.994 |
|                                     |          | 2      | 1.574 | 0.951 | 0.694 | 0.978 | 0.167 | 0.995 |
|                                     |          | 3      | 1.215 | 0.952 | 0.480 | 0.982 | 0.163 | 0.995 |
|                                     | (80,64)  | 1      | 1.211 | 0.955 | 0.385 | 0.986 | 0.165 | 0.996 |
|                                     |          | 2      | 1.184 | 0.958 | 0.379 | 0.986 | 0.135 | 0.998 |
|                                     |          | 3      | 1.090 | 0.960 | 0.374 | 0.987 | 0.131 | 0.998 |
| (1.5,2.5)                           | (40,20)  | 1      | 1.782 | 0.952 | 1.122 | 0.959 | 0.319 | 0.981 |
|                                     |          | 2      | 1.536 | 0.953 | 0.956 | 0.964 | 0.311 | 0.982 |
|                                     |          | 3      | 1.428 | 0.954 | 0.949 | 0.965 | 0.307 | 0.982 |
|                                     | (40,32)  | 1      | 1.261 | 0.954 | 0.876 | 0.968 | 0.268 | 0.984 |
|                                     |          | 2      | 1.212 | 0.956 | 0.777 | 0.972 | 0.213 | 0.987 |
|                                     |          | 3      | 1.145 | 0.960 | 0.750 | 0.974 | 0.184 | 0.989 |
|                                     | (80,40)  | 1      | 1.137 | 0.962 | 0.762 | 0.973 | 0.191 | 0.990 |
|                                     |          | 2      | 0.983 | 0.964 | 0.756 | 0.974 | 0.178 | 0.991 |
|                                     |          | 3      | 0.963 | 0.966 | 0.734 | 0.976 | 0.171 | 0.992 |
|                                     | (80,64)  | 1      | 0.835 | 0.967 | 0.405 | 0.982 | 0.169 | 0.994 |
|                                     |          | 2      | 0.812 | 0.969 | 0.396 | 0.982 | 0.165 | 0.994 |
|                                     |          | 3      | 0.747 | 0.972 | 0.386 | 0.983 | 0.162 | 0.995 |

Table S7: The ACLs (1st column) and CPs (2nd column) of 95% ACI/HPD intervals of  $R(t)$ .

| $(T_1, T_2)$<br>Prior $\rightarrow$ | $(n, m)$ | Scheme | ACI   |       | HPD   |       |       |       |
|-------------------------------------|----------|--------|-------|-------|-------|-------|-------|-------|
|                                     |          |        | ACL   | CP    | 1     |       | 2     |       |
|                                     |          |        |       |       | ACL   | CP    | ACL   | CP    |
| (0.5,1.5)                           | (40,20)  | 1      | 0.173 | 0.905 | 0.145 | 0.937 | 0.130 | 0.941 |
|                                     |          | 2      | 0.167 | 0.906 | 0.133 | 0.939 | 0.118 | 0.945 |
|                                     |          | 3      | 0.158 | 0.907 | 0.129 | 0.940 | 0.114 | 0.946 |
|                                     | (40,32)  | 1      | 0.129 | 0.916 | 0.108 | 0.948 | 0.102 | 0.949 |
|                                     |          | 2      | 0.121 | 0.918 | 0.101 | 0.949 | 0.096 | 0.952 |
|                                     |          | 3      | 0.118 | 0.920 | 0.095 | 0.951 | 0.086 | 0.955 |
|                                     | (80,40)  | 1      | 0.110 | 0.924 | 0.084 | 0.957 | 0.079 | 0.958 |
|                                     |          | 2      | 0.089 | 0.926 | 0.081 | 0.957 | 0.076 | 0.960 |
|                                     |          | 3      | 0.088 | 0.932 | 0.078 | 0.959 | 0.071 | 0.963 |
|                                     | (80,64)  | 1      | 0.096 | 0.932 | 0.069 | 0.963 | 0.064 | 0.962 |
|                                     |          | 2      | 0.088 | 0.934 | 0.065 | 0.963 | 0.061 | 0.965 |
|                                     |          | 3      | 0.076 | 0.936 | 0.060 | 0.964 | 0.057 | 0.967 |
| (1.5,2.5)                           | (40,20)  | 1      | 0.156 | 0.909 | 0.143 | 0.938 | 0.120 | 0.944 |
|                                     |          | 2      | 0.155 | 0.910 | 0.125 | 0.941 | 0.112 | 0.946 |
|                                     |          | 3      | 0.154 | 0.911 | 0.120 | 0.942 | 0.103 | 0.947 |
|                                     | (40,32)  | 1      | 0.127 | 0.917 | 0.102 | 0.950 | 0.094 | 0.953 |
|                                     |          | 2      | 0.119 | 0.919 | 0.093 | 0.952 | 0.088 | 0.954 |
|                                     |          | 3      | 0.111 | 0.921 | 0.090 | 0.953 | 0.080 | 0.956 |
|                                     | (80,40)  | 1      | 0.094 | 0.928 | 0.079 | 0.959 | 0.071 | 0.962 |
|                                     |          | 2      | 0.090 | 0.931 | 0.075 | 0.960 | 0.067 | 0.963 |
|                                     |          | 3      | 0.083 | 0.934 | 0.067 | 0.963 | 0.061 | 0.965 |
|                                     | (80,64)  | 1      | 0.090 | 0.933 | 0.059 | 0.965 | 0.054 | 0.966 |
|                                     |          | 2      | 0.086 | 0.935 | 0.051 | 0.966 | 0.048 | 0.968 |
|                                     |          | 3      | 0.074 | 0.938 | 0.046 | 0.968 | 0.041 | 0.970 |



Table S8: The ACLs (1st column) and CPs (2nd column) of 95% ACI/HPD intervals of  $h(t)$ .

| $(T_1, T_2)$<br>Prior $\rightarrow$ | $(n, m)$ | Scheme | ACI   |       | HPD   |       |       |       |
|-------------------------------------|----------|--------|-------|-------|-------|-------|-------|-------|
|                                     |          |        |       |       | 1     |       | 2     |       |
|                                     |          |        | ACL   | CP    | ACL   | CP    | ACL   | CP    |
| (0.5,1.5)                           | (40,20)  | 1      | 1.010 | 0.913 | 0.787 | 0.921 | 0.692 | 0.926 |
|                                     |          | 2      | 0.977 | 0.918 | 0.692 | 0.925 | 0.578 | 0.932 |
|                                     |          | 3      | 0.927 | 0.922 | 0.682 | 0.926 | 0.527 | 0.934 |
|                                     | (40,32)  | 1      | 0.763 | 0.925 | 0.661 | 0.929 | 0.577 | 0.932 |
|                                     |          | 2      | 0.620 | 0.928 | 0.596 | 0.932 | 0.518 | 0.937 |
|                                     |          | 3      | 0.611 | 0.930 | 0.463 | 0.941 | 0.414 | 0.948 |
|                                     | (80,40)  | 1      | 0.564 | 0.934 | 0.520 | 0.937 | 0.370 | 0.956 |
|                                     |          | 2      | 0.459 | 0.942 | 0.432 | 0.952 | 0.315 | 0.959 |
|                                     |          | 3      | 0.440 | 0.944 | 0.408 | 0.954 | 0.302 | 0.960 |
|                                     | (80,64)  | 1      | 0.476 | 0.950 | 0.420 | 0.953 | 0.280 | 0.961 |
|                                     |          | 2      | 0.441 | 0.952 | 0.404 | 0.954 | 0.220 | 0.963 |
|                                     |          | 3      | 0.437 | 0.952 | 0.356 | 0.957 | 0.185 | 0.967 |
| (1.5,2.5)                           | (40,20)  | 1      | 0.919 | 0.923 | 0.752 | 0.925 | 0.671 | 0.930 |
|                                     |          | 2      | 0.911 | 0.925 | 0.653 | 0.929 | 0.571 | 0.933 |
|                                     |          | 3      | 0.901 | 0.926 | 0.622 | 0.932 | 0.483 | 0.937 |
|                                     | (40,32)  | 1      | 0.648 | 0.930 | 0.616 | 0.933 | 0.522 | 0.937 |
|                                     |          | 2      | 0.614 | 0.932 | 0.569 | 0.936 | 0.505 | 0.939 |
|                                     |          | 3      | 0.583 | 0.935 | 0.456 | 0.942 | 0.371 | 0.956 |
|                                     | (80,40)  | 1      | 0.471 | 0.939 | 0.438 | 0.948 | 0.323 | 0.958 |
|                                     |          | 2      | 0.435 | 0.944 | 0.410 | 0.953 | 0.299 | 0.962 |
|                                     |          | 3      | 0.414 | 0.946 | 0.381 | 0.957 | 0.283 | 0.963 |
|                                     | (80,64)  | 1      | 0.450 | 0.952 | 0.413 | 0.955 | 0.179 | 0.969 |
|                                     |          | 2      | 0.422 | 0.954 | 0.384 | 0.956 | 0.157 | 0.972 |
|                                     |          | 3      | 0.402 | 0.957 | 0.345 | 0.959 | 0.159 | 0.972 |
